# Supplementary material for: Free Sugars Intake, Sources and Determinants of High Consumption among Australian 2-Year-Olds in the SMILE Cohort
Source: PubMed Central journal article supplement (PMC6356352; doi:10.3390/nu11010161), 2019-01-13
Supplement: nutrients-11-00161-s001.pdf [file nutrients-11-00161-s001.pdf]

**Table S1.** Characteristics of participants who completed both the 1 and 2 year dietary questionnaires.

|                                                 | Completed both questionnaires (n = 682) |          |     | Did not complete both questionnaires (n = 1499) |          |     | <i>p</i> <sup>a</sup> |
|-------------------------------------------------|-----------------------------------------|----------|-----|-------------------------------------------------|----------|-----|-----------------------|
|                                                 | n                                       | mean     | SD  | n                                               | mean     | SD  |                       |
| Mother's age at birth (years)                   | 680                                     | 30.9     | 4.8 | 1421                                            | 29.4     | 5.6 | <0.001                |
| Total number of children                        | 661                                     | 1.7      | 0.9 | 1206                                            | 1.9      | 1.0 | 0.005                 |
| Child's birthweight (g)                         | 674                                     | 3411     | 562 | 1409                                            | 3329     | 575 | 0.002                 |
| Child's age at 24HR (months)                    | 682                                     | 13.1     | 1.0 | 146                                             | 13.1     | 0.9 | 0.736                 |
| Child's age at FFQ (months)                     | 670                                     | 25.2     | 1.1 | 451                                             | 26.1     | 2.0 | <0.001                |
|                                                 | <b>n</b>                                | <b>%</b> |     | <b>n</b>                                        | <b>%</b> |     |                       |
| Mother's age at birth (years)                   |                                         |          |     |                                                 |          |     | <0.001                |
| <25                                             | 55                                      | 8.1      |     | 281                                             | 19.8     |     |                       |
| 25-34.99                                        | 481                                     | 70.7     |     | 872                                             | 61.4     |     |                       |
| ≥35                                             | 144                                     | 21.2     |     | 268                                             | 18.9     |     |                       |
| Mother's pre-pregnancy BMI (kg/m <sup>2</sup> ) |                                         |          |     |                                                 |          |     | 0.002                 |
| <25                                             | 398                                     | 61.8     |     | 688                                             | 53.4     |     |                       |
| 25-29.99 (overweight)                           | 132                                     | 20.5     |     | 323                                             | 25.1     |     |                       |
| ≥30 (obese)                                     | 114                                     | 17.7     |     | 278                                             | 21.6     |     |                       |
| Mother's Country of Birth                       |                                         |          |     |                                                 |          |     | <0.001                |
| Australia or New Zealand                        | 513                                     | 75.8     |     | 940                                             | 66.2     |     |                       |
| Other                                           | 164                                     | 24.2     |     | 480                                             | 33.8     |     |                       |
| Mother's Education                              |                                         |          |     |                                                 |          |     | <0.001                |
| high school / vocational                        | 273                                     | 40.3     |     | 863                                             | 60.5     |     |                       |
| some university and above                       | 405                                     | 59.7     |     | 563                                             | 39.5     |     |                       |
| IRSAD                                           |                                         |          |     |                                                 |          |     | <0.001                |
| Deciles 1–2 (most disadvantaged)                | 93                                      | 13.7     |     | 369                                             | 26.3     |     |                       |
| Deciles 3–4                                     | 141                                     | 20.8     |     | 305                                             | 21.7     |     |                       |
| Deciles 5–6                                     | 141                                     | 20.8     |     | 249                                             | 17.7     |     |                       |
| Deciles 7–8                                     | 137                                     | 20.2     |     | 248                                             | 17.7     |     |                       |
| Deciles 9–10 (most advantaged)                  | 165                                     | 24.4     |     | 233                                             | 16.6     |     |                       |
| Total number of children                        |                                         |          |     |                                                 |          |     | 0.082                 |
| 1                                               | 320                                     | 48.4     |     | 543                                             | 45.0     |     |                       |
| 2                                               | 240                                     | 36.3     |     | 430                                             | 35.7     |     |                       |
| ≥3                                              | 101                                     | 15.3     |     | 233                                             | 19.3     |     |                       |
| Child's sex                                     |                                         |          |     |                                                 |          |     | 0.175                 |
| Male                                            | 374                                     | 54.8     |     | 772                                             | 51.7     |     |                       |
| Female                                          | 308                                     | 45.2     |     | 721                                             | 48.3     |     |                       |
| Mother's smoking status at 1 year               |                                         |          |     |                                                 |          |     | 0.035                 |
| no                                              | 625                                     | 93.0     |     | 540                                             | 89.7     |     |                       |
| yes                                             | 47                                      | 7.0      |     | 62                                              | 10.3     |     |                       |

<sup>a</sup> *p*-values for responders v non-responders using t-test (continuous) or Pearson Chi Square test (categorical). 24HR: 24-hour recall; FFQ: Food Frequency Questionnaire; BMI: Body Mass Index IRSAD: Index of Relative Socioeconomic Advantage and Disadvantage

**Table S2.** Participant characteristics, sub-set for sensitivity analysis: responders at 2 years with calculated EER from weight data vs reference EER imputed for age and sex.

|                                                 | Calculated EER from weight ( <i>n</i> = 918) |      |     | Imputed (reference) EER ( <i>n</i> = 125) |      |     | <i>p</i> <sup>a</sup> |
|-------------------------------------------------|----------------------------------------------|------|-----|-------------------------------------------|------|-----|-----------------------|
|                                                 | <i>n</i>                                     | mean | SD  | <i>n</i>                                  | mean | SD  |                       |
| Mother's age at birth (years)                   | 915                                          | 30.6 | 4.9 | 125                                       | 30.2 | 5.4 | 0.483                 |
| Total number of children                        | 890                                          | 1.8  | 0.9 | 123                                       | 1.7  | 0.9 | 0.806                 |
| Child's birthweight (g)                         | 908                                          | 3398 | 548 | 124                                       | 3355 | 537 | 0.411                 |
| Child's age at FFQ (months)                     | 895                                          | 25.5 | 1.5 | 120                                       | 25.6 | 1.6 | 0.433                 |
|                                                 | <i>n</i>                                     | %    |     | <i>n</i>                                  | %    |     | <i>p</i> <sup>a</sup> |
| Mother's age at birth (years)                   |                                              |      |     |                                           |      |     | 0.043                 |
| <25                                             | 86                                           | 9.4  |     | 19                                        | 15.2 |     |                       |
| 25-34.99                                        | 642                                          | 70.2 |     | 75                                        | 60.0 |     |                       |
| ≥35                                             | 187                                          | 20.4 |     | 31                                        | 24.8 |     |                       |
| Mother's pre-pregnancy BMI (kg/m <sup>2</sup> ) |                                              |      |     |                                           |      |     | 0.351                 |
| <25                                             | 493                                          | 57.1 |     | 72                                        | 64.3 |     |                       |
| 25-29.99 (overweight)                           | 197                                          | 22.8 |     | 21                                        | 18.8 |     |                       |
| ≥30 (obese)                                     | 173                                          | 20.0 |     | 19                                        | 17.0 |     |                       |
| Mother's Country of Birth                       |                                              |      |     |                                           |      |     | 0.799                 |
| Australia or New Zealand                        | 665                                          | 73.1 |     | 90                                        | 72.0 |     |                       |
| Other                                           | 245                                          | 26.9 |     | 35                                        | 28.0 |     |                       |
| Mother's Education                              |                                              |      |     |                                           |      |     | 0.903                 |
| high school / vocational                        | 396                                          | 43.4 |     | 55                                        | 44.0 |     |                       |
| some university and above                       | 516                                          | 56.6 |     | 70                                        | 56.0 |     |                       |
| IRSAD                                           |                                              |      |     |                                           |      |     | 0.256                 |
| Deciles 1–2 (most disadvantaged)                | 144                                          | 15.8 |     | 28                                        | 22.6 |     |                       |
| Deciles 3–4                                     | 195                                          | 21.4 |     | 19                                        | 15.3 |     |                       |
| Deciles 5–6                                     | 183                                          | 20.1 |     | 27                                        | 21.8 |     |                       |
| Deciles 7–8                                     | 177                                          | 19.4 |     | 22                                        | 17.7 |     |                       |
| Deciles 9–10 (most advantaged)                  | 213                                          | 23.4 |     | 28                                        | 22.6 |     |                       |
| Total number of children                        |                                              |      |     |                                           |      |     | 0.734                 |
| 1                                               | 421                                          | 47.3 |     | 59                                        | 48.0 |     |                       |
| 2                                               | 322                                          | 36.2 |     | 47                                        | 38.2 |     |                       |
| ≥3                                              | 147                                          | 16.5 |     | 17                                        | 13.8 |     |                       |
| Child's sex                                     |                                              |      |     |                                           |      |     | 0.755                 |
| Male                                            | 491                                          | 53.5 |     | 65                                        | 52.0 |     |                       |
| Female                                          | 427                                          | 46.5 |     | 60                                        | 48.0 |     |                       |
| Mother's smoking status at 1 year               |                                              |      |     |                                           |      |     | 0.135                 |
| no                                              | 767                                          | 92.9 |     | 95                                        | 88.8 |     |                       |
| yes                                             | 59                                           | 7.1  |     | 12                                        | 11.2 |     |                       |

<sup>a</sup> *p*-values for calculated v imputed EER using t-test (continuous) or Pearson Chi Square test (categorical). 24HR: 24-hour recall; FFQ: Food Frequency Questionnaire; BMI: Body Mass Index IRSAD: Index of Relative Socioeconomic Advantage and Disadvantage

**Table S3.** Free Sugars intakes at 2 years of age, sub-set for sensitivity analysis: responders with imputed EER excluded ( $n = 918$ ).

|                                                                 | Median | Percentile |       | Range       |
|-----------------------------------------------------------------|--------|------------|-------|-------------|
|                                                                 |        | 25th,      | 75th  |             |
| Free Sugars (g/day)                                             | 22.0   | 12.7,      | 37.6  | 0.6 – 140.7 |
| Total Sugars (g/day)                                            | 77.2   | 55.6,      | 104.7 | 9.4 – 294.8 |
| Estimated Energy Requirement (kJ/day)                           | 4841   | 4394,      | 5260  | 2644 – 8193 |
| Percentage of Estimated Energy Requirement from Free Sugars (%) | 7.5    | 4.5,       | 13.2  | 0.2 – 61.3  |

**Table S4.** Tertile of free sugars intakes from 1 to 2 years of age, sub-set for sensitivity analysis: responders with imputed EER excluded ( $n = 623$ ).

|                       |      | Free Sugars at 2 Years |            |            |
|-----------------------|------|------------------------|------------|------------|
|                       |      | Low                    | Mid        | High       |
| Free Sugars at 1 year | Low  | 104 (16.7%)            | 66 (10.6%) | 34 (5.5%)  |
|                       | Mid  | 76 (12.2%)             | 68 (10.9%) | 68 (10.9%) |
|                       | High | 48 (7.7%)              | 60 (9.6%)  | 99 (15.9%) |

Weighted Kappa 0.221,  $p < .001$

**Table S5:** Participant characteristics associated with high consumption of free sugars at 2 years, sub-set for sensitivity analysis: responders with imputed EER excluded ( $n = 829$ ).

|                                                 | Free sugars highest tertile |              | Free Sugars Intake $\geq 10\%$ EER |              |
|-------------------------------------------------|-----------------------------|--------------|------------------------------------|--------------|
|                                                 | PR                          | 95%CI        | PR                                 | 95%CI        |
| Mother's age at birth (years)                   |                             |              |                                    |              |
| <25                                             | 1.59                        | [1.10, 2.30] | 1.51                               | [1.09, 2.11] |
| 25-34.99                                        | 1.11                        | [0.84, 1.44] | 1.09                               | [0.86, 1.38] |
| $\geq 35$                                       | 1.00                        |              | 1.00                               |              |
| Mother's pre-pregnancy BMI (kg/m <sup>2</sup> ) |                             |              |                                    |              |
| <25 Healthy weight or below                     | 1.00                        |              | 1.00                               |              |
| 25-29.99 Overweight                             | 1.08                        | [0.86, 1.38] | 1.02                               | [0.82, 1.26] |
| $\geq 30$ Obese                                 | 0.98                        | [0.75, 1.28] | 0.92                               | [0.71, 1.19] |
| Mother's Country of Birth                       |                             |              |                                    |              |
| Other                                           | 1.47                        | [1.18, 1.84] | 1.54                               | [1.26, 1.88] |
| Australia, New Zealand                          | 1.00                        |              | 1.00                               |              |
| Mother's Education                              |                             |              |                                    |              |
| University                                      | 0.84                        | [0.68, 1.04] | 0.83                               | [0.68, 1.01] |
| High school / vocational                        | 1.00                        |              | 1.00                               |              |
| IRSAD                                           |                             |              |                                    |              |
| Deciles 1–2 (most disadvantaged)                | 1.49                        | [1.10, 2.02] | 1.40                               | [1.06, 1.84] |
| Deciles 3–4                                     | 1.32                        | [0.99, 1.78] | 1.34                               | [1.04, 1.73] |
| Deciles 5–6                                     | 0.95                        | [0.68, 1.33] | 0.93                               | [0.69, 1.26] |
| Deciles 7–8                                     | 0.99                        | [0.71, 1.37] | 0.98                               | [0.73, 1.31] |
| Deciles 9–10 (most advantaged)                  | 1.00                        |              | 1.00                               |              |
| Total number of children                        |                             |              |                                    |              |
| 1                                               | 1.00                        |              | 1.00                               |              |
| 2                                               | 1.31                        | [1.05, 1.64] | 1.20                               | [0.98, 1.47] |
| $\geq 3$                                        | 1.42                        | [1.07, 1.88] | 1.33                               | [1.03, 1.72] |
| Child's sex                                     |                             |              |                                    |              |
| Female                                          | 0.90                        | [0.74, 1.10] | 0.94                               | [0.79, 1.12] |
| Male                                            | 1.00                        |              | 1.00                               |              |

PR: Prevalence Ratio; BMI: Body Mass Index (kg/m<sup>2</sup>); IRSAD: Index of Relative Socioeconomic Advantage and Disadvantage.
